# Supplementary material for: Sucrose intensity coding and decision-making in rat gustatory cortices
Source: eLife. 2018 Nov 19;7:e41152. doi: 10.7554/eLife.41152 (PMC6292697; doi:10.7554/eLife.41152)
Supplement: Supplementary file 1. [file elife-41152-supp1.xlsx]

## Sheet: Hoja1
Fig	Test	Variables			Statistic	p	Post hoc	Groups	p
1. Behavior	Student's Paired t	Peformance before vs after surgery			t(27)=0.95	n.s
		Generalization before vs after			t(7)=1.43	n.s
	One-way ANOVA	Performance of subjects by structure			F(2, 87)=0.29	n.s
	One-way ANOVA	Latencies per trial type during the epoch	Stimulus (Licking time per intensity during generalization sessions)		F(7,1360)=17.10	<0.0001	Dunnett	T3 vs T18	<0.0001
								T3 vs 0	n.s
								T3 vs 3	n.s
								T3 vs 4.75	<0.01
								T3 vs 7.5	<0.0001
								T3 vs 11.75	<0.0001
								T3 vs 18	<0.0001
	Student's Unpaired t		Response (Movement time per side)		t(892)=0.49	n.s
			Return (Movement time per side)		t(892)=2.65	<0.01
			Outcome (Licking time per outcome)		t(892)=10.66	<0.0001
3. Neural Decoder: Non-Sel vs Int-Sel	One-way ANOVA	Neural Decoder performance between neuron groups (Non-Evoked, All, Non-Selective, Intensity-Selective)		pIC	F(3,120)=62.31	<0.0001	Bonferroni	Non-Evo vs All	<0.0001
								Non-Evo vs Non-Sel	<0.01
								Non-Evo vs Inten-Sel	<0.0001
								All vs Inten-Sel	n.s
				aIC	F(3,120)=102.7	<0.0001	Bonferroni	Non-Evo vs All	<0.0001
								Non-Evo vs Non-Sel	<0.0001
								Non-Evo vs Inten-Sel	<0.0001
								All vs Inten-Sel	<0.0001
				OFC	F(3,120)=46.55	<0.0001	Bonferroni	Non-Evo vs All	<0.0001
								Non-Evo vs Non-Sel	<0.01
								Non-Evo vs Inten-Sel	<0.0001
								All vs Inten-Sel	n.s
Fig	Test	Variables			Statistic	p	Post hoc	Groups	p
3. Neural Decoder: Shuffled spikes	Paired t-test	Spike Timing: Neural Decoder performance between shuffled and non shuffled spikes	pIC	Non-Evoked	t(30)=1.72	n.s
				All	t(30)=10.23	<0.0001
				Non-Selective	t(30)=5.98	<0.0001
				Selective	t(30)=8.49	<0.0001
			aIC	Non-Evoked	t(30)=1.39	n.s
				All	t(30)=14.22	<0.0001
				Non-Selective	t(30)=19.04	<0.0001
				Selective	t(30)=8.63	<0.0001
			OFC	Non-Evoked	t(30)=9.89	<0.0001
				All	t(30)=8.74	<0.0001
				Non-Selective	t(30)=6.61	<0.0001
				Selective	t(30)=6.95	<0.0001
3. Neural Decoder: Shuffled trials	Paired t-test	Noise correlation: Neural Decoder performance between shuffled and non shuffled trials	pIC	Non-Evoked	t(30)=0.06	n.s
				All	t(30)=1.05	n.s
				Non-Selective	t(30)=0.96	n.s
				Selective	t(30)=0.47	n.s
			aIC	Non-Evoked	t(30)=0.48	n.s
				All	t(30)=1.25	n.s
				Non-Selective	t(30)=0.62	n.s
				Selective	t(30)=1.004	n.s
			OFC	Non-Evoked	t(30)=0.64	n.s
				All	t(30)=0.66	n.s
				Non-Selective	t(30)=0.68	n.s
				Selective	t(30)=0.74	n.s
5. Choice	Pearson's correlation	Correlation between psychometric and neurometric performance	Aligned to Response	aIC	r2=0.99	<0.0001
				OFC	r2=0.99	<0.0001
6. Direction	Chi-square	Proportion of Left- vs Right-Direction Selective neurons		pIC	χ2=59.95	<0.0001
				aIC	χ2=27.13	<0.0001
				OFC	χ2=52.26	<0.0001
		Proportion of Direction-selective neurons between brain regions		pIC vs aIC	χ2=0.001	n.s
				pIC vs OFC	χ2=23.85	<0.0001
				OFC vs aIC	χ2=22.32	<0.0001
7. Outcome	Chi-square	Proportion of Inactive- vs Active-Outcome neurons		pIC	χ2=72.88	<0.0001
				aIC	χ2=12.05	0.0005
				OFC	χ2=1.079	n.s
		Proportion of Outcome-selective neurons between brain regions		pIC vs aIC	χ2=0.02	n.s
				pIC vs OFC	χ2=0.23	n.s
				OFC vs aIC	χ2=0.34	n.s
3–supp 3. Coherence	One-way ANOVA	Coherence value (spikes vs licks) per Epoch		pIC	F(2,2316)=226	<0.0001	Dunnett	pre-Stim vs Stimulus	<0.0001
								pre-Stim vs Outcome	n.s
				aIC	F(2,2064)=189.6	<0.0001		pre-Stim vs Stimulus	<0.0001
								pre-Stim vs Outcome	<0.01
				OFC	F(2,1208)=112	<0.0001		pre-Stim vs Stimulus	<0.0001
								pre-Stim vs Outcome	<0.0001
