# Supplementary material for: Sucrose intensity coding and decision-making in rat gustatory cortices
Source: eLife. 2018 Nov 19;7:e41152. doi: 10.7554/eLife.41152 (PMC6292697; doi:10.7554/eLife.41152)
Supplement: Supplementary file 2. [file elife-41152-supp2.xlsx]

## Sheet: Hoja1
Table	Test	Variables			Statistic	p	Post hoc	Groups	p
1. Proportion of Cue-Evoked and Non-Evoked Neurons	Chi-square	Proportion neuron type x Structure	Phasic	pIC vs aIC	χ2=0.03	n.s
				pIC vs OFC	χ2=10.73	<0.001
				aIC vs OFC	χ2=11.29	<0.001
			Inactive	pIC vs aIC	χ2=0.45	n.s
				pIC vs OFC	χ2=86.45	<0.0001
				aIC vs OFC	χ2=68.96	<0.0001
			Active	pIC vs aIC	χ2=1.57	n.s
				pIC vs OFC	χ2=34.95	<0.0001
				aIC vs OFC	χ2=20.48	<0.0001
			Lick-Coherent Inactive	pIC vs aIC	χ2=2.16	n.s
				pIC vs OFC	χ2=37.31	<0.0001
				aIC vs OFC	χ2=21.59	<0.0001
			Lick-Coherent Active	pIC vs aIC	χ2=8.85	<0.01
				pIC vs OFC	χ2=64.53	<0.0001
				aIC vs OFC	χ2=107	<0.0001
			Non-Evoked	pIC vs aIC	χ2=44.65	<0.0001
				pIC vs OFC	χ2=3.03	n.s
				aIC vs OFC	χ2=23.72	<0.0001
2. Proportion of Cue-Evoked neurons: Non-Selective	Chi-square	Proportion of Intensity-Selective neurons x Structure	Phasic	pIC vs aIC	χ2=0.54	n.s
				pIC vs OFC	χ2=6.97	<0.01
				aIC vs OFC	χ2=10.37	<0.01
			Inactive	pIC vs aIC	χ2=0.34	n.s
				pIC vs OFC	χ2=70.62	<0.0001
				aIC vs OFC	χ2=56.69	<0.0001
			Active	pIC vs aIC	χ2=0.14	n.s
				pIC vs OFC	χ2=17.53	<0.0001
				aIC vs OFC	χ2=13.55	<0.001
			Lick-Coherent Inactive	pIC vs aIC	χ2=1.26	n.s
				pIC vs OFC	χ2=36.27	<0.0001
				aIC vs OFC	χ2=23.95	<0.0001
			Lick-Coherent Active	pIC vs aIC	χ2=3.77	<0.05
				pIC vs OFC	χ2=68.17	<0.0001
				aIC vs OFC	χ2=94.01	<0.0001
Table	Test	Variables			Statistic	p	Post hoc	Groups	p
2. Proportion of Cue-Evoked neurons: Intensity-Selective	Chi-square	Proportion of Intensity-Selective neurons x Structure	Phasic	pIC vs aIC	χ2=1.02	n.s
				pIC vs OFC	χ2=4.10	<0.05
				aIC vs OFC	χ2=1.22	n.s
			Inactive	pIC vs aIC	χ2=0.19	n.s
				pIC vs OFC	χ2=23.93	<0.0001
				aIC vs OFC	χ2=18.30	<0.0001
			Active	pIC vs aIC	χ2=6.13	<0.05
				pIC vs OFC	χ2=30.61	<0.0001
				aIC vs OFC	χ2=9.51	<0.01
			Lick-Coherent Inactive	pIC vs aIC	χ2=1.44	n.s
				pIC vs OFC	χ2=4.45	<0.05
				aIC vs OFC	χ2=0.91	n.s
			Lick-Coherent Active	pIC vs aIC	χ2=10.27	<0.01
				pIC vs OFC	χ2=2.68	n.s
				aIC vs OFC	χ2=19.35	<0.0001
Table	Test	Variables			Statistic	p	Post hoc	Groups	p
3. Neural Decoder performance: Inclussion analysis (one population at a time)	One-way ANOVA	Neural Decoder performance between Non-Evoked, All, Inactive, Active, Lick Coherent Active, Lick Coherent Inactive, All Tonic, All Lick Coherent groups		pIC	F(7,240)= 50.11	<0.0001	Dunnett	Non-Evo vs All	<0.0001
								Non-Evo vs Inact	n.s
								Non-Evo vs Act	n.s
								Non-Evo vs Coh-Inact	<0.0001
								Non-Evo vs Coh-Act	<0.0001
								Non-Evo vs All Tonic	n.s
								Non-Evo vs All Coh	<0.0001
				aIC	F(7,240)= 81.18	<0.0001	Dunnett	Non-Evo vs All	<0.0001
								Non-Evo vs Inact	n.s
								Non-Evo vs Act	<0.0001
								Non-Evo vs Coh-Inact	<0.0001
								Non-Evo vs Coh-Act	<0.0001
								Non-Evo vs All Tonic	<0.0001
								Non-Evo vs All Coh	<0.0001
				OFC	F(7,240)= 24.65	<0.0001	Dunnett	Non-Evo vs All	<0.0001
								Non-Evo vs Inact	n.s
								Non-Evo vs Act	<0.01
								Non-Evo vs Coh-Inact	<0.0001
								Non-Evo vs Coh-Act	<0.0001
								Non-Evo vs All Tonic	<0.01
								Non-Evo vs All Coh	<0.0001
	Student's unpaired t	Neural Decoder performance between Non-Evoked vs Phasic group (200 ms)		pIC	t(40)=5.36	<0.0001
				aIC	t(40)=5.17	<0.0001
				OFC	t(40)=1.52	n.s
Table	Test	Variables			Statistic	p	Post hoc	Groups	p
4. Neural Decoder performance: Dropped analysis (one population at a time)	One-way ANOVA	Neural Decoder performance between All, Inactive, Active, Lick Coherent Active, Lick Coherent Inactive, All Tonic, All Lick Coherent groups		pIC	F(6,210)= 12.03	<0.0001	Dunnett	All vs Inact	n.s
								All vs Act	n.s
								All vs Coh-Inact	<0.05
								All vs Coh-Act	n.s
								All vs All Tonic	n.s
								All vs All Coh	<0.0001
				aIC	F(6,210)= 25.34	<0.0001	Dunnett	All vs Inact	n.s
								All vs Act	n.s
								All vs Coh-Inact	<0.05
								All vs Coh-Act	<0.0001
								All vs All Tonic	n.s
								All vs All Coh	<0.0001
				OFC	F(6,210)= 5.43	<0.0001	Dunnett	All vs Inact	n.s
								All vs Act	n.s
								All vs Coh-Inact	n.s
								All vs Coh-Act	n.s
								All vs All Tonic	n.s
								All vs All Coh	<0.0001
	Student's unpaired t	Neural Decoder performance between All vs Phasic group (200 ms)		pIC	t(40)=3.91	0.0003
				aIC	t(40)=1.44	n.s
				OFC	t(40)=2.40	0.02
